# Supplementary material for: B Cell Signatures Distinguish Cutaneous Lupus Erythematosus Subtypes and the Presence of Systemic Disease Activity
Source: PubMed Central journal article supplement (PMC8640489; doi:10.3389/fimmu.2021.775353), 2021-11-19

# Supplemental Figure 1

**A.**

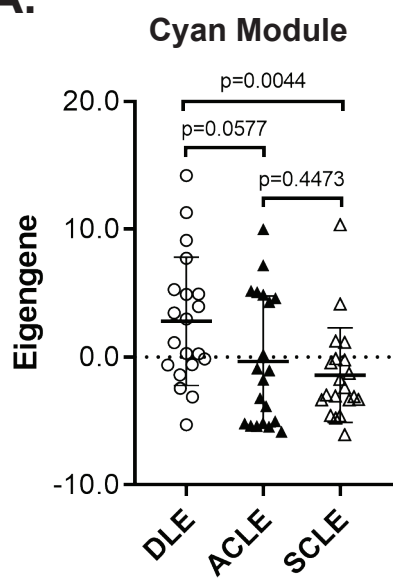

**B.**

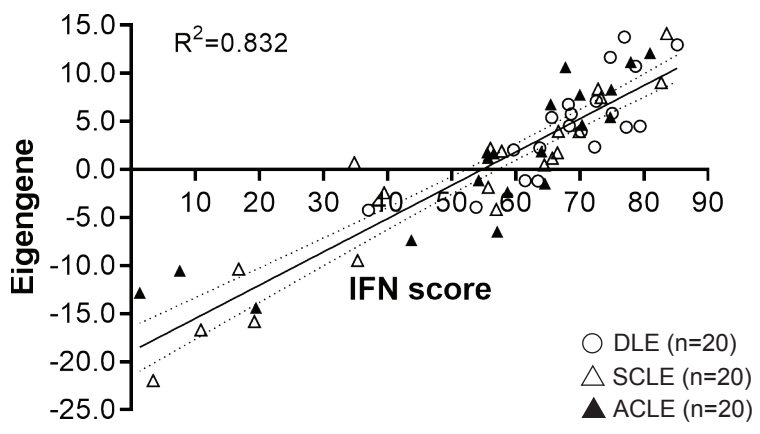

Supplement: DataSheet_1.pdf [file DataSheet_1.pdf]
