# Supplementary material for: B Cell Signatures Distinguish Cutaneous Lupus Erythematosus Subtypes and the Presence of Systemic Disease Activity
Source: PubMed Central journal article supplement (PMC8640489; doi:10.3389/fimmu.2021.775353), 2021-11-19

# Supplemental Figure 3

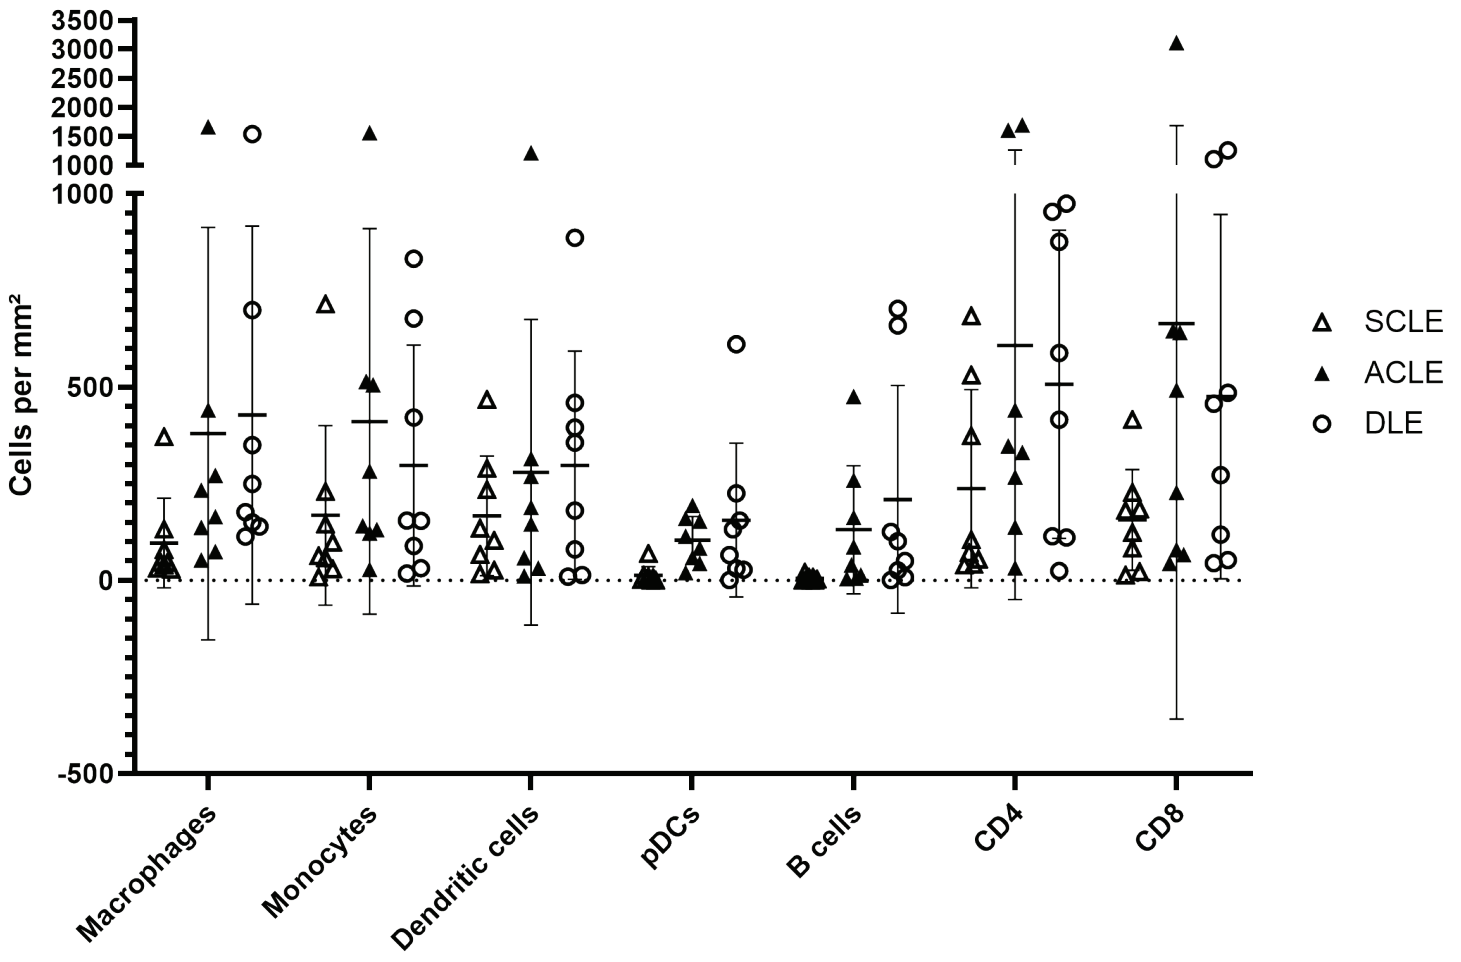

Supplement: DataSheet_3.pdf [file DataSheet_3.pdf]
