# Supplementary material for: B Cell Signatures Distinguish Cutaneous Lupus Erythematosus Subtypes and the Presence of Systemic Disease Activity
Source: PubMed Central journal article supplement (PMC8640489; doi:10.3389/fimmu.2021.775353), 2021-11-19
Supplement: Table_1.pdf [file Table_1.pdf]

**Supplemental Table 1. Summary characteristics of lupus patients included in the CLE discovery cohort (published in Berthier & Tsoi, 2019) and the validation cohort.** Clinical data were not available for 9 DLE patients, 12 SCLE patients, and 1 ACLE patient in the validation cohort.

| DISCOVERY COHORT                                   | DLE<br>(n=47) | SCLE<br>(n=43) |
|----------------------------------------------------|---------------|----------------|
| Mean Age (years±SEM)                               | 45.2 (2.0)    | 47.2 (2.7)     |
| Gender (% Female)                                  | 78.7          | 83.7           |
| Ethnicity (% African-American)                     | 40.4          | 4.7            |
| Body Mass Index (±SEM)                             | 28.0 (0.9)    | 27.6 (1.2)     |
| SLEDAI (±SEM)                                      | 7.1 (0.8)     | 9.3 (1.2)      |
| CLASI Activity (±SEM)                              | 6.4 (0.5)     | 8.2 (0.6)      |
| CLASI Damage (±SEM)                                | 4.2 (0.7)     | 0.7 (0.3)      |
| % ≥4 ACR criteria for SLE within 3 years of biopsy | 46.8          | 55.8           |
| Lupus nephritis (%)                                | 4.3           | 11.6           |
| Positive anti-Smith antibodies (%)                 | 23.4          | 25.6           |
| Positive anti- Ro antibodies (%)                   | 31.9          | 58.1           |
| Positive antiphospholipid antibodies (%)           | 10.6          | 25.6           |
| dsDNA titer (±SEM)                                 | 9.6 (2.8)     | 35.0 (13.4)    |
| IFN score (±SEM)                                   | 19.3 (0.2)    | 15.8 (0.2)     |
| <b>Medications (% on drug at time of biopsy)</b>   |               |                |
| Oral Prednisone <10 mg daily                       | 8.5           | 4.7            |
| Oral Prednisone >10 mg daily                       | 10.6          | 23.3           |
| Mycophenolate Mofetil                              | 2.1           | 11.6           |
| Antimalarials                                      | 40.4          | 44.2           |
| Methotrexate                                       | 2.1           | 0              |

| VALIDATION COHORT                                  | DLE<br>(n=10)             | SCLE<br>(n=9)            | ACLE<br>(n=19)         |
|----------------------------------------------------|---------------------------|--------------------------|------------------------|
| Mean Age (years±SEM)                               | 45.2 (6.3)                | 65.2 (4.6)               | 44.4 (3.4)             |
| Gender (% Female)                                  | 80.0                      | 88.9                     | 89.5                   |
| Ethnicity (% African-American)                     | 30.0                      | 0                        | 36.8                   |
| Body Mass Index (±SEM)                             | 24.8 (1.3)                | 25.5 (1.5)               | 29.6 (2.0)             |
| SLEDAI (±SEM)                                      | 13.3 (0.7) <sup>a</sup>   | 8.0 (3.1) <sup>a</sup>   | 9.9 (2.1) <sup>b</sup> |
| CLASI Activity (±SEM)                              | 10.3 (1.6)                | 15.4 (2.4)               | 10.7 (2.2)             |
| CLASI Damage (±SEM)                                | 3.8 (1.2)                 | 2.0 (1.4)                | 2.5 (1.1)              |
| % ≥4 ACR criteria for SLE within 3 years of biopsy | 30.0                      | 33.3                     | 57.9                   |
| Lupus nephritis (%)                                | 0.0                       | 0.0                      | 10.5                   |
| Positive anti-Smith antibodies (%)                 | 0.0 <sup>c</sup>          | 12.5 <sup>c</sup>        | 15.8                   |
| Positive anti- Ro antibodies (%)                   | 50.0 <sup>c</sup>         | 77.8                     | 52.6                   |
| Positive antiphospholipid antibodies (%)           | 0.0 <sup>d</sup>          | 0.0 <sup>a</sup>         | 35.7 <sup>e</sup>      |
| dsDNA titer (±SEM)                                 | 166.0 (21.1) <sup>f</sup> | 35.5 (35.5) <sup>g</sup> | 252.0 (61.0)           |
| IFN score (±SEM)*                                  | 68.6 (5.3)                | 51.6 (12.1)              | 56.0 (11.1)            |
| <b>Medications (% on drug at time of biopsy)</b>   |                           |                          |                        |
| Oral Prednisone <10 mg daily                       | 10.0                      | 11.1                     | 10.5                   |

|                              |      |      |      |
|------------------------------|------|------|------|
| Oral Prednisone >10 mg daily | 20.0 | 22.2 | 26.3 |
| Mycophenolate Mofetil        | 10.0 | 0.0  | 15.8 |
| Antimalarials                | 10.0 | 33.3 | 36.8 |
| Methotrexate                 | 0.0  | 11.1 | 5.3  |

\*IFN score was calculated from gene expression data from all 20 DLE, 20 SCLÉ and 20 ACLE patients. <sup>a</sup>Data were available for 3 patients. <sup>b</sup>Data were available for 11 patients. <sup>c</sup>Data were available for 8 patients. <sup>d</sup>Data were available for 4 patients. <sup>e</sup>Data were available for 14 patients. <sup>f</sup>Data were available for 9 patients. <sup>g</sup>Data were available for 5 patients.
