# Supplementary material for: B Cell Signatures Distinguish Cutaneous Lupus Erythematosus Subtypes and the Presence of Systemic Disease Activity
Source: PubMed Central journal article supplement (PMC8640489; doi:10.3389/fimmu.2021.775353), 2021-11-19
Supplement: Table_2.pdf [file Table_2.pdf]

## Supplemental Table 2

| <b>Pathway</b>                                                                 | <b>p-value</b> |
|--------------------------------------------------------------------------------|----------------|
| <b>B Cell Receptor Signaling</b>                                               | 6.31E-33       |
| IL-15 Signaling                                                                | 2.51E-32       |
| <b>Systemic Lupus Erythematosus in B Cell Signaling Pathway</b>                | 1.58E-31       |
| Communication between Innate and Adaptive Immune Cells                         | 3.98E-31       |
| Primary Immunodeficiency Signaling                                             | 4.47E-09       |
| Role of Macrophages, Fibroblasts and Endothelial Cells in Rheumatoid Arthritis | 4.79E-04       |
| Systemic Lupus Erythematosus Signaling                                         | 6.17E-04       |
| Phospholipase C Signaling                                                      | 8.91E-04       |
| Hematopoiesis from Pluripotent Stem Cells                                      | 1.51E-03       |
| Autoimmune Thyroid Disease Signaling                                           | 1.66E-03       |
| Allograft Rejection Signaling                                                  | 2.09E-03       |
| Dendritic Cell Maturation                                                      | 4.27E-03       |
| Phagosome Formation                                                            | 7.41E-03       |
| Altered T Cell and B Cell Signaling in Rheumatoid Arthritis                    | 1.82E-02       |
| April Mediated Signaling                                                       | 4.68E-02       |
| <b>B Cell Activating Factor Signaling</b>                                      | 4.79E-02       |
| <b>B Cell Development</b>                                                      | 4.79E-02       |
