# Supplementary material for: B Cell Signatures Distinguish Cutaneous Lupus Erythematosus Subtypes and the Presence of Systemic Disease Activity
Source: PubMed Central journal article supplement (PMC8640489; doi:10.3389/fimmu.2021.775353), 2021-11-19
Supplement: Table_3.pdf [file Table_3.pdf]

**Supplemental Table 3:** List of the 746 genes associated with IFN score in the yellow module of the WGCNA analysis from the discovery cohort.

|           |            |           |          |           |
|-----------|------------|-----------|----------|-----------|
| AAMP      | CTBS       | IFI27     | OASL     | SNORD4A   |
| ABHD10    | CTSL       | IFI30     | OAZ2     | SNORD7    |
| ACIN1     | CTSLP2     | IFI35     | ODF3B    | SNORD70   |
| ACLY      | CX3CL1     | IFI44     | OGFR     | SNORD8    |
| ACP2      | CXCL1      | IFI44L    | OTUD4    | SNRPC     |
| ACTA2-AS1 | CXCL10     | IFI6      | P2RY6    | SNX2      |
| ADA       | CXCL11     | IFIH1     | PANK2    | SOCS1     |
| ADAR      | CXCL16     | IFIT1     | PARP11   | SP100     |
| ADCY7     | CXCR2P1    | IFIT2     | PARP12   | SP110     |
| ADD1      | CXorf38    | IFIT3     | PARP14   | SPATS2L   |
| ADGRE5    | CYBA       | IFIT5     | PARP9    | SPI1      |
| ADPRH     | CYREN      | IFITM1    | PAX8     | SRA1      |
| ADRB2     | CYTH1      | IFITM3    | PCNX1    | SS18L2    |
| AGAP3     | CYTH4      | IFITM4P   | PDCD1LG2 | ST3GAL1   |
| AGK       | DBNL       | IGHM      | PDIA4    | ST3GAL5   |
| AGO2      | DCP2       | IGHV3-30  | PELO     | STARD4    |
| AGPAT3    | DDIT3      | IGHV3-7   | PFKP     | STAT1     |
| AIM2      | DDX10      | IKBKE     | PHF11    | STAT2     |
| AKIRIN1   | DDX58      | IL12RB2   | PI4K2B   | STAT6     |
| AKT1      | DDX60      | IL15RA    | PIK3AP1  | STK10     |
| AKT1S1    | DDX60L     | IL1B      | PILRA    | STK11     |
| AKT2      | DENND2D    | IL6R      | PLAAT2   | STOM      |
| ALAS1     | DENND5A    | INTS7     | PLAAT4   | STX4      |
| ALG11     | DGLUCY     | IRF7      | PLAC8    | STXBP2    |
| ALPK1     | DHX58      | IRF9      | PLAUR    | STYXL1    |
| AMBRA1    | DIABLO     | ISG15     | PLEKHB2  | SULF1     |
| AMMECR1   | DIAPH1-AS1 | ISG20     | PLEKHO2  | SUMO3     |
| ANGPTL6   | DIS3L2     | ITGB7     | PLK4     | SYK       |
| ANKFY1    | DMAP1      | ITPK1     | PLSCR1   | SYMPK     |
| ANKRD22   | DNAI3      | JDP2      | PML      | SYNGR2    |
| ANXA10    | DNAJA1     | JPT1      | PNPO     | TAP1      |
| APOBEC3A  | DNASE2     | KCNE1     | PNPT1    | TAP2      |
| APOBEC3D  | DNM2       | KCNQ5-IT1 | POLDIP3  | TAPBP     |
| APOBEC3G  | DNMT1      | KCTD2     | PPM1K    | TCN2      |
| APOBEC3H  | DOCK8-AS1  | KCTD5     | PPP1R18  | TCTA      |
| APOC1     | DOT1L      | KDM4A-AS1 | PPP6R1   | TDO2      |
| APOL1     | DPM2       | KHDC4     | PPP6R2   | TDRD7     |
| APOL2     | DRAM1      | KIAA0040  | PRAM1    | TEC       |
| APOL3     | DRAP1      | KIF21B    | PRKCD    | TEX48     |
| APOL6     | DTX3L      | KLF16     | PRKCE    | TFEB      |
| AQP9      | DUSP10     | KLF6      | PRKD2    | TGFB1     |
| ARAP1     | DUSP3      | KLHDC7B   | PRPF3    | TGOLN2    |
| ARF4      | DUSP5      | KRT6A     | PRR13    | TH2LCRR   |
| ARFGAP1   | DUSP6      | KYNU      | PRR14L   | THEMIS2   |
| ARHGAP4   | DYNLT1     | LAG3      | PSD4     | THOC7-AS1 |
| ARHGDI1   | ECT2       | LAIR1     | PSENN    | TIMMDC1   |

|           |          |              |           |           |
|-----------|----------|--------------|-----------|-----------|
| ARHGEF11  | EDARADD  | LAMP3        | PSMB2     | TK1       |
| ARID1A    | EDEM1    | LAP3         | PSMB8     | TLE5      |
| ARID5A    | EFHD2    | LASP1        | PSMB8-AS1 | TLK2      |
| ARL14     | EGFL6    | LCN2         | PSMB9     | TLR2      |
| ARL4C     | EHBP1L1  | LGALS17A     | PSMD9     | TLR3      |
| ARPC1B    | EHD4     | LGALS3BP     | PSME1     | TLR7      |
| ARPP19    | EIF1AY   | LILRB1       | PSME2     | TMEM140   |
| ARRDC1    | EIF2AK2  | LILRB3       | PSMF1     | TMEM222   |
| ASAP1-IT1 | ELAVL1   | LILRB4       | PTAFR     | TMEM268   |
| ASB16-AS1 | ELF4     | LINC00487    | PTGER2    | TMEM60    |
| ATP10A    | ELK1     | LINC01260    | PTK2B     | TNFAIP2   |
| ATP13A2   | ELMO2    | LINC02316    | PTOV1-AS1 | TNFRSF10B |
| ATP6V1F   | EMP3     | LINS1        | PTPN23    | TNFRSF14  |
| ATP8B4    | ENO1     | LIPG         | PTPRE     | TNFSF10   |
| ATXN7     | ENPP2    | LLPH         | PTTG1     | TNFSF13B  |
| B2M       | EPB41L3  | LMNB1        | PUDP      | TNFSF15   |
| B4GALT5   | EPSTI1   | LOC100288175 | QRSL1     | TNIP1     |
| BATF2     | ETV7     | LOC100288637 | RAB33B    | TNK2      |
| BAX       | EXOSC9   | LOC101926887 | RAB35     | TPTE2P5   |
| BCL2A1    | FAM104A  | LOC101927377 | RAB39A    | TRAF3     |
| BCL3      | FAM20A   | LOC101927762 | RAB8A     | TRAFD1    |
| BCL7B     | FAM225A  | LOC101929540 | RAD23A    | TRANK1    |
| BIN1      | FAM53B   | LOC102724420 | RAP1B     | TRAPPC1   |
| BIRC2     | FAM83G   | LOC284454    | RAP1GAP2  | TRAV19    |
| BLVRA     | FAS      | LOC644135    | RAP2B     | TRBJ2-1   |
| BRCA2     | FAS-AS1  | LPIN2        | RARA      | TRBJ2-2   |
| BRIP1     | FBXO5    | LRRC25       | RBCK1     | TRDJ1     |
| BRMS1     | FBXO6    | LRRC4        | RBM14     | TRDV1     |
| BSDC1     | FCER1G   | LRRC42       | RELA      | TREX1     |
| BST2      | FCGR1B   | LRRC59       | RELB      | TRIM14    |
| BTN3A1    | FCN1     | LSP1         | REXO4     | TRIM21    |
| BTN3A2    | FFAR2    | LY6E         | RGL1      | TRIM22    |
| BUB1      | FGFR10P2 | LY6E-DT      | RHBDF2    | TRIM25    |
| BUD23     | FIGNL1   | LYN          | RHOG      | TRIM38    |
| C1GALT1   | FLJ42393 | LYSMD2       | RILPL1    | TRIM4     |
| C1orf74   | FLVCR2   | MAEA         | RILPL2    | TRIM5     |
| C1QA      | FMNL1    | MAP2K1       | RLIM      | TRIM56    |
| C1QB      | FOSL1    | MAP3K11      | RNF114    | TRIM69    |
| C1QC      | FPR1     | MAP3K8       | RNF138    | TRMT11    |
| C2        | FPR2     | MARK2        | RNF19B    | TRPC4AP   |
| C2CD4B    | FPR3     | MASTL        | RNF213    | TTC38     |
| C3AR1     | FSCN1    | MAX          | RNF31     | TTC5      |
| C3orf38   | FUOM     | MBD1         | RNF40     | TTC7A     |
| C5AR1     | FUT4     | MCFD2        | RNU5F-1   | TTLL4     |
| C6orf62   | FZR1     | MCL1         | RNU6-59P  | TYMP      |
| CADM3-AS1 | GADD45B  | MCM10        | RPL13P5   | TYROBP    |
| CALM3     | GALNT10  | MCRIP1       | RPL23AP7  | UBA7      |
| CALR      | GBP1     | MDK          | RRM2B     | UBALD1    |
| CARD16    | GBP1P1   | MED15        | RSAD2     | UBALD2    |

|         |          |          |          |           |
|---------|----------|----------|----------|-----------|
| CASP1   | GBP2     | MGAT1    | RTP4     | UBAP1     |
| CASP10  | GBP3     | MILR1    | RUBCN    | UBE2L6    |
| CBX6    | GBP4     | MIR1183  | RUFY4    | UHMK1     |
| CC2D1B  | GCH1     | MIR142   | RUNX2    | UNC93B1   |
| CCDC12  | GCNT1    | MIR3140  | RUNX3    | USF2      |
| CCDC9   | GCNT2    | MIR3174  | RXRB     | USP15     |
| CCL2    | GFOD1    | MIR4441  | SAMD9    | USP18     |
| CCL3    | GGA2     | MIR4517  | SAMD9L   | USP28     |
| CCL5    | GLIS3    | MIR548Q  | SAMHD1   | USP30-AS1 |
| CCL7    | GLT1D1   | MIR643   | SAT1     | USP36     |
| CCL8    | GLUL     | MKNK2    | SBNO2    | VAMP8     |
| CCM2    | GMIP     | MLKL     | SCAF1    | VASP      |
| CCND1   | GMPR     | MMP1     | SCAMP3   | VCPIP1    |
| CCR1    | GNB2     | MOB3A    | SCML4    | VTRNA1-1  |
| CCR5    | GOLM1    | MOB3C    | SCO2     | VTRNA1-3  |
| CCRL2   | GPD2     | MPDU1    | SDC3     | WARS1     |
| CD14    | GPR18    | MRPL44   | SECTM1   | WASIR2    |
| CD180   | GPX4     | MTHFD2   | SEMA4D   | WDFY1     |
| CD274   | GREM1    | MVP      | SEPTIN9  | WDTC1     |
| CD38    | GRINA    | MX1      | SERPINB1 | WNT10A    |
| CD47    | GRK6     | MX2      | SERPING1 | XAF1      |
| CD68    | GTF2F1   | MYD88    | SETD1B   | XRN1      |
| CD80    | GTPBP1   | MYDGF    | SF1      | XRRA1     |
| CD82    | GZMB     | MYO9B    | SH3BP1   | YEATS2    |
| CDC25B  | H2BC12   | N4BP1    | SH3BP2   | YIPF2     |
| CDKN1B  | H2BC14   | NABP1    | SHFL     | YJU2      |
| CEBPA   | H2BC5    | NAGK     | SHKBP1   | ZBP1      |
| CFB     | H3C11    | NAMPT    | SIGLEC14 | ZBTB17    |
| CH25H   | H3C4     | NANS     | SIK3     | ZC3H10    |
| CHAD    | H4C13    | NAPA     | SIRPB1   | ZC3HAV1   |
| CHEK1   | HAVCR2   | NBEAL2   | SLC15A3  | ZCCHC2    |
| CHMP5   | HCP5     | NCF2     | SLC31A2  | ZFAND3    |
| CHROMR  | HDAC1    | NDUFAF4  | SLC35A4  | ZFAT      |
| CHST12  | HDDC3    | NECTIN2  | SLC38A5  | ZFP36L2   |
| CIAO2A  | HERC5    | NFATC2IP | SLC45A4  | ZFYVE26   |
| CIAO2B  | HERC6    | NFKB1    | SLFN12   | ZMIZ2     |
| CIB1    | HESX1    | NFKB2    | SLFN5    | ZNF189    |
| CISH    | HIRA     | NFKBIA   | SMCHD1   | ZNF235    |
| CKAP2L  | HLA-A    | NIPSNAP1 | SMTNL1   | ZNF296    |
| CLCN7   | HLA-B    | NLRC5    | SNAR-D   | ZNF484    |
| CLDN20  | HLA-C    | NMI      | SNAR-G1  | ZNF526    |
| CLEC16A | HLA-DRB1 | NNT-AS1  | SNAR-G2  | ZNF534    |
| CLEC7A  | HLA-E    | NOD1     | SNORA1   | ZNF552    |
| CLK3    | HLA-F    | NR1H2    | SNORA11B | ZNF580    |
| CMPK2   | HLA-H    | NRIP1    | SNORA13  | ZNF589    |
| CMTR1   | HMGXB3   | NT5C3A   | SNORA25  | ZNF592    |
| CNDP2   | HNRNPF   | NT5E     | SNORA31  | ZNF687    |
| CNKSR1  | HOXB2    | NUB1     | SNORA65  | ZNF706    |
| CNP     | HSCB     | NUCB1    | SNORA74A | ZNF707    |

|        |           |        |             |       |
|--------|-----------|--------|-------------|-------|
| CNPY3  | HSH2D     | NUDCD1 | SNORA74B    | ZNFX1 |
| COPS7A | HSP90AB4P | NUP210 | SNORA9      | ZRSR2 |
| COQ10B | ICAM1     | NUP62  | SNORD116-14 |       |
| CPNE1  | IDO1      | OAS1   | SNORD12     |       |
| CRAMP1 | IER5      | OAS2   | SNORD15B    |       |
| CSF1   | IFI16     | OAS3   | SNORD21     |       |
