# Supplementary material for: B Cell Signatures Distinguish Cutaneous Lupus Erythematosus Subtypes and the Presence of Systemic Disease Activity
Source: PubMed Central journal article supplement (PMC8640489; doi:10.3389/fimmu.2021.775353), 2021-11-19
Supplement: Table_4.pdf [file Table_4.pdf]

**Supplemental Table 4. xCell analysis results and statistics from the discovery and validation cohorts.** Comparisons between study groups were made using two-sided unpaired Students' *t*-test. P-values<0.05 are highlighted in bold.

| <b>DISCOVERY COHORT</b>                |                  |                   |                 |                  |                  |                   |                              |
|----------------------------------------|------------------|-------------------|-----------------|------------------|------------------|-------------------|------------------------------|
| <b>Cell type</b>                       | <b>Mean CTLs</b> | <b>STDEV CTLs</b> | <b>Mean DLE</b> | <b>STDEV DLE</b> | <b>Mean SCLE</b> | <b>STDEV SCLE</b> | <b>p-value (DLE vs SCLE)</b> |
| <b>B-cells</b>                         | 0.0427           | 0.0492            | 0.1370          | 0.0845           | 0.0721           | 0.0588            | <b>0.0001</b>                |
| <b>naive B-cells</b>                   | 0.0018           | 0.0065            | 0.0176          | 0.0323           | 0.0009           | 0.0040            | <b>0.0011</b>                |
| <b>Memory B-cells</b>                  | 0.0388           | 0.0434            | 0.0626          | 0.0493           | 0.0238           | 0.0305            | <b>0.0000</b>                |
| Class-switched memory B-cells          | 0.0749           | 0.0741            | 0.1248          | 0.0810           | 0.1027           | 0.0747            | 0.1840                       |
| pro B-cells                            | 0.0384           | 0.0506            | 0.0366          | 0.0350           | 0.0252           | 0.0326            | 0.1126                       |
| Plasma cells                           | 0.0225           | 0.0191            | 0.0273          | 0.0414           | 0.0237           | 0.0356            | 0.6607                       |
| CD4+ memory T-cells                    | 0.1201           | 0.0944            | 0.3187          | 0.1119           | 0.2666           | 0.1187            | 0.0349                       |
| CD4+ naive T-cells                     | 0.0631           | 0.0560            | 0.0708          | 0.0567           | 0.0693           | 0.0568            | 0.8965                       |
| CD4+ T-cells                           | 0.0788           | 0.0690            | 0.1770          | 0.0870           | 0.1615           | 0.0864            | 0.3993                       |
| CD4+ Tcm                               | 0.0461           | 0.0630            | 0.0635          | 0.0634           | 0.0732           | 0.0720            | 0.4986                       |
| CD4+ Tem                               | 0.0954           | 0.0998            | 0.2025          | 0.1036           | 0.1675           | 0.0977            | 0.1033                       |
| CD8+ T-cells                           | 0.0568           | 0.0400            | 0.1039          | 0.0541           | 0.0851           | 0.0502            | 0.0911                       |
| CD8+ naive T-cells                     | 0.1018           | 0.0750            | 0.0573          | 0.0538           | 0.0673           | 0.0570            | 0.3912                       |
| CD8+ Tcm                               | 0.0578           | 0.0713            | 0.1201          | 0.0650           | 0.0911           | 0.0588            | 0.0295                       |
| CD8+ Tem                               | 0.0557           | 0.0708            | 0.2015          | 0.0762           | 0.1799           | 0.0589            | 0.1398                       |
| Tregs                                  | 0.0324           | 0.0402            | 0.1121          | 0.0663           | 0.1052           | 0.0818            | 0.6569                       |
| <b>Th1 cells</b>                       | 0.1367           | 0.1022            | 0.2459          | 0.1250           | 0.1951           | 0.1082            | <b>0.0431</b>                |
| Th2 cells                              | 0.0183           | 0.0238            | 0.0288          | 0.0414           | 0.0176           | 0.0248            | 0.1284                       |
| Tgd cells                              | 0.0820           | 0.0530            | 0.1310          | 0.0534           | 0.1289           | 0.0471            | 0.8426                       |
| NK cells                               | 0.0438           | 0.0665            | 0.0682          | 0.0665           | 0.0546           | 0.0555            | 0.2956                       |
| NKT                                    | 0.2230           | 0.1382            | 0.2472          | 0.1682           | 0.2629           | 0.1673            | 0.6579                       |
| Hematopoietic stem cells               | 0.3848           | 0.0860            | 0.2242          | 0.1122           | 0.2339           | 0.1101            | 0.6785                       |
| Common lymphoid progenitor             | 0.1187           | 0.0637            | 0.1325          | 0.0507           | 0.1281           | 0.0554            | 0.6963                       |
| Common myeloid progenitor              | 0.0995           | 0.0524            | 0.0606          | 0.0496           | 0.0524           | 0.0508            | 0.4404                       |
| Granulocyte-macrophage progenitor      | 0.0928           | 0.0672            | 0.0490          | 0.0495           | 0.0383           | 0.0505            | 0.3127                       |
| Megakaryocyte-erythroid progenitor     | 0.0931           | 0.0772            | 0.0194          | 0.0367           | 0.0293           | 0.0428            | 0.2407                       |
| Multipotent progenitors                | 0.0493           | 0.0671            | 0.2571          | 0.1518           | 0.2134           | 0.1623            | 0.1902                       |
| Erythrocytes                           | 0.0232           | 0.0324            | 0.0059          | 0.0115           | 0.0065           | 0.0144            | 0.8367                       |
| Monocytes                              | 0.0152           | 0.0280            | 0.0419          | 0.0451           | 0.0413           | 0.0461            | 0.9440                       |
| Macrophages                            | 0.1042           | 0.0811            | 0.1951          | 0.0662           | 0.1834           | 0.0657            | 0.3995                       |
| Macrophages M1                         | 0.0209           | 0.0265            | 0.0560          | 0.0318           | 0.0521           | 0.0307            | 0.5545                       |
| Macrophages M2                         | 0.0663           | 0.0718            | 0.1569          | 0.0748           | 0.1536           | 0.0850            | 0.8470                       |
| Dendritic cells                        | 0.0785           | 0.0649            | 0.1049          | 0.0503           | 0.0914           | 0.0555            | 0.2304                       |
| Conventional DC                        | 0.1671           | 0.0439            | 0.1149          | 0.0897           | 0.1037           | 0.0856            | 0.5476                       |
| Plasmacytoid DC                        | 0.0515           | 0.0607            | 0.1870          | 0.0773           | 0.1708           | 0.0596            | 0.2733                       |
| Immature DC                            | 0.0578           | 0.0428            | 0.0482          | 0.0379           | 0.0486           | 0.0370            | 0.9668                       |
| Activated DC                           | 0.0911           | 0.0651            | 0.1784          | 0.0335           | 0.1662           | 0.0351            | 0.0953                       |
| Neutrophils                            | 0.0206           | 0.0368            | 0.0331          | 0.0351           | 0.0320           | 0.0312            | 0.8700                       |
| Eosinophils                            | 0.1088           | 0.0855            | 0.1532          | 0.1088           | 0.1791           | 0.1457            | 0.3388                       |
| Mast cells                             | 0.0239           | 0.0143            | 0.0186          | 0.0129           | 0.0176           | 0.0142            | 0.7460                       |
| Basophils                              | 0.1188           | 0.0938            | 0.1022          | 0.1306           | 0.1264           | 0.1306            | 0.3830                       |
| Mesenchymal stem cells                 | 0.3516           | 0.2156            | 0.2534          | 0.1972           | 0.2928           | 0.2080            | 0.3579                       |
| Adipocytes                             | 0.1497           | 0.0980            | 0.1429          | 0.0747           | 0.1379           | 0.0796            | 0.7611                       |
| Preadipocytes                          | 0.0503           | 0.0423            | 0.0483          | 0.0434           | 0.0548           | 0.0504            | 0.5138                       |
| Fibroblasts                            | 0.0938           | 0.0777            | 0.0547          | 0.0618           | 0.0844           | 0.0910            | 0.0714                       |
| Endothelial cells                      | 0.0899           | 0.0680            | 0.0436          | 0.0484           | 0.0539           | 0.0515            | 0.3319                       |
| <b>Microvascular endothelial cells</b> | 0.0972           | 0.0639            | 0.0550          | 0.0569           | 0.0824           | 0.0520            | <b>0.0194</b>                |
| Lymphatic endothelial cells            | 0.0980           | 0.0610            | 0.0682          | 0.0579           | 0.0787           | 0.0585            | 0.3928                       |
| Smooth muscle cells                    | 0.0707           | 0.0590            | 0.0204          | 0.0324           | 0.0146           | 0.0257            | 0.3574                       |
| Skeletal muscle cells                  | 0.0410           | 0.0169            | 0.0297          | 0.0220           | 0.0279           | 0.0216            | 0.6972                       |

|                        |        |        |        |        |        |        |               |
|------------------------|--------|--------|--------|--------|--------|--------|---------------|
| Epithelial cells       | 0.2040 | 0.0574 | 0.1642 | 0.0564 | 0.1790 | 0.0499 | 0.1937        |
| Sebocytes              | 0.0140 | 0.0019 | 0.0160 | 0.0053 | 0.0170 | 0.0047 | 0.3428        |
| Keratinocytes          | 0.1121 | 0.0300 | 0.1014 | 0.0389 | 0.1123 | 0.0374 | 0.1809        |
| Mesangial cells        | 0.0140 | 0.0179 | 0.0406 | 0.0237 | 0.0445 | 0.0301 | 0.4991        |
| Melanocytes            | 0.0531 | 0.0367 | 0.0532 | 0.0314 | 0.0628 | 0.0308 | 0.1479        |
| Immune Score           | 0.3821 | 0.2201 | 0.6886 | 0.1766 | 0.6120 | 0.1480 | <b>0.0289</b> |
| Stroma Score           | 0.1667 | 0.0982 | 0.1206 | 0.0620 | 0.1381 | 0.0804 | 0.2481        |
| Microenvironment Score | 0.5488 | 0.2030 | 0.8092 | 0.1595 | 0.7500 | 0.1500 | 0.0741        |

### VALIDATION COHORT

| Cell type                            | Mean CTLS | STDEV CTLS | Mean DLE | STDEV DLE | Mean SCLE | STDEV SCLE | Mean ACLE | STDEV ACLE | p-value (DLE v SCLE) | p-value (DLE v ACLE) | p-value (SCLE v ACLE) |
|--------------------------------------|-----------|------------|----------|-----------|-----------|------------|-----------|------------|----------------------|----------------------|-----------------------|
| <b>B-cells</b>                       | 0.1360    | 0.1236     | 0.4753   | 0.1424    | 0.2360    | 0.1161     | 0.2849    | 0.2205     | <b>0.0000</b>        | <b>0.0025</b>        | 0.3864                |
| naive B-cells                        | 0.0097    | 0.0194     | 0.1487   | 0.0756    | 0.0365    | 0.0514     | 0.0703    | 0.0970     | <b>0.0000</b>        | <b>0.0070</b>        | 0.1762                |
| <b>Memory B-cells</b>                | 0.0616    | 0.0705     | 0.1490   | 0.0714    | 0.0577    | 0.0571     | 0.0667    | 0.0689     | <b>0.0001</b>        | <b>0.0007</b>        | 0.6539                |
| <b>Class-switched memory B-cells</b> | 0.2708    | 0.1381     | 0.4386   | 0.1170    | 0.2921    | 0.1369     | 0.2948    | 0.1997     | <b>0.0008</b>        | <b>0.0084</b>        | 0.9609                |
| pro B-cells                          | 0.0061    | 0.0122     | 0.0308   | 0.0510    | 0.0310    | 0.0512     | 0.0269    | 0.0596     | 0.9904               | 0.8254               | 0.8171                |
| Plasma cells                         | 0.0582    | 0.0454     | 0.0492   | 0.0688    | 0.0384    | 0.0432     | 0.0539    | 0.0790     | 0.5542               | 0.8416               | 0.4444                |
| CD4+ memory T-cells                  | 0.1568    | 0.1223     | 0.5222   | 0.2897    | 0.3952    | 0.2311     | 0.4969    | 0.3601     | 0.1335               | 0.8072               | 0.2947                |
| CD4+ naive T-cells                   | 0.1647    | 0.1914     | 0.2645   | 0.1488    | 0.2203    | 0.1693     | 0.2365    | 0.2310     | 0.3862               | 0.6516               | 0.8014                |
| CD4+ T-cells                         | 0.0398    | 0.0604     | 0.2782   | 0.1981    | 0.2166    | 0.1582     | 0.2922    | 0.2521     | 0.2840               | 0.8466               | 0.2633                |
| CD4+ Tcm                             | 0.2080    | 0.1454     | 0.2283   | 0.1502    | 0.1800    | 0.1250     | 0.2435    | 0.1738     | 0.2759               | 0.7687               | 0.1925                |
| CD4+ Tem                             | 0.0785    | 0.0658     | 0.2935   | 0.1787    | 0.1653    | 0.1717     | 0.2921    | 0.2363     | <b>0.0262</b>        | 0.9837               | 0.0595                |
| CD8+ T-cells                         | 0.1049    | 0.0595     | 0.1693   | 0.1161    | 0.1186    | 0.1219     | 0.1245    | 0.1199     | 0.1859               | 0.2370               | 0.8787                |
| CD8+ naive T-cells                   | 0.2693    | 0.0892     | 0.2620   | 0.1725    | 0.2671    | 0.1727     | 0.2399    | 0.1557     | 0.9258               | 0.6730               | 0.6037                |
| CD8+ Tcm                             | 0.0218    | 0.0366     | 0.2713   | 0.1719    | 0.1486    | 0.1424     | 0.1811    | 0.1595     | <b>0.0187</b>        | 0.0936               | 0.5013                |
| CD8+ Tem                             | 0.0000    | 0.0000     | 0.1911   | 0.1272    | 0.0873    | 0.1114     | 0.1502    | 0.1476     | <b>0.0092</b>        | 0.3541               | 0.1365                |
| Tregs                                | 0.0201    | 0.0401     | 0.1486   | 0.1189    | 0.1307    | 0.1395     | 0.1596    | 0.1567     | 0.6642               | 0.8049               | 0.5420                |
| Th1 cells                            | 0.0333    | 0.0396     | 0.3016   | 0.1453    | 0.2219    | 0.1549     | 0.1830    | 0.1632     | 0.1017               | <b>0.0201</b>        | 0.4448                |
| Th2 cells                            | 0.0946    | 0.0689     | 0.1684   | 0.0959    | 0.1613    | 0.0851     | 0.1421    | 0.1031     | 0.8061               | 0.4084               | 0.5236                |
| Tgd cells                            | 0.0514    | 0.0622     | 0.2269   | 0.1018    | 0.1768    | 0.1020     | 0.2197    | 0.1366     | 0.1284               | 0.8514               | 0.2676                |
| NK cells                             | 0.0482    | 0.0964     | 0.3396   | 0.1633    | 0.2926    | 0.1569     | 0.2377    | 0.1999     | 0.3593               | 0.0857               | 0.3405                |
| NKT                                  | 0.7026    | 0.2604     | 0.8509   | 0.4574    | 0.8194    | 0.2687     | 0.8275    | 0.2750     | 0.7919               | 0.8458               | 0.9250                |
| Hematopoietic stem cells             | 0.5806    | 0.2432     | 0.1624   | 0.1909    | 0.2384    | 0.2458     | 0.2895    | 0.2932     | 0.2814               | 0.1124               | 0.5539                |
| Common lymphoid progenitor           | 0.2938    | 0.1620     | 0.3234   | 0.1315    | 0.3087    | 0.1268     | 0.3384    | 0.1333     | 0.7207               | 0.7225               | 0.4748                |
| Common myeloid progenitor            | 0.2625    | 0.0762     | 0.0355   | 0.0573    | 0.0765    | 0.1149     | 0.1075    | 0.1060     | 0.1618               | <b>0.0110</b>        | 0.3796                |
| Granulocyte-macrophage progenitor    | 0.0327    | 0.0653     | 0.0307   | 0.0565    | 0.0907    | 0.0972     | 0.0522    | 0.0767     | <b>0.0220</b>        | 0.3198               | 0.1722                |
| Megakaryocyte-erythroid progenitor   | 0.0523    | 0.0923     | 0.0037   | 0.0166    | 0.0051    | 0.0168     | 0.0186    | 0.0605     | 0.7968               | 0.2958               | 0.3424                |
| Multipotent progenitors              | 0.6266    | 0.2646     | 1.1954   | 0.2888    | 1.1281    | 0.3725     | 0.9742    | 0.5071     | 0.5271               | 0.0983               | 0.2809                |
| Erythrocytes                         | 0.0000    | 0.0000     | 0.0003   | 0.0015    | 0.0002    | 0.0010     | 0.0000    | 0.0000     | 0.7719               | 0.3236               | 0.3236                |
| Monocytes                            | 0.0414    | 0.0828     | 0.1741   | 0.1441    | 0.1655    | 0.1318     | 0.1879    | 0.1617     | 0.8446               | 0.7764               | 0.6328                |
| Macrophages                          | 0.0221    | 0.0256     | 0.1899   | 0.1078    | 0.1810    | 0.1046     | 0.1840    | 0.1004     | 0.7929               | 0.8577               | 0.9284                |

|                                 |        |        |        |        |        |        |        |        |               |               |               |
|---------------------------------|--------|--------|--------|--------|--------|--------|--------|--------|---------------|---------------|---------------|
| Macrophages M1                  | 0.0000 | 0.0000 | 0.0968 | 0.0511 | 0.0502 | 0.0570 | 0.0736 | 0.0441 | <b>0.0097</b> | 0.1329        | 0.1542        |
| Macrophages M2                  | 0.0269 | 0.0538 | 0.1410 | 0.1262 | 0.1858 | 0.1280 | 0.1616 | 0.1465 | 0.2716        | 0.6367        | 0.5803        |
| Dendritic cells                 | 0.1500 | 0.1122 | 0.1664 | 0.1121 | 0.1679 | 0.1304 | 0.2175 | 0.1688 | 0.9704        | 0.2665        | 0.3043        |
| Conventional DC                 | 0.3299 | 0.1764 | 0.1374 | 0.1586 | 0.1591 | 0.1582 | 0.2518 | 0.1945 | 0.6674        | <b>0.0485</b> | 0.1065        |
| Plasmacytoid DC                 | 0.1072 | 0.1377 | 0.3653 | 0.1911 | 0.2441 | 0.1394 | 0.3270 | 0.1638 | 0.0275        | 0.5000        | 0.0928        |
| Immature DC                     | 0.1360 | 0.0545 | 0.0827 | 0.0851 | 0.1336 | 0.1029 | 0.1243 | 0.1207 | 0.0966        | 0.2155        | 0.7949        |
| Activated DC                    | 0.0894 | 0.0654 | 0.3117 | 0.0720 | 0.2619 | 0.1116 | 0.3033 | 0.1126 | 0.1021        | 0.7824        | 0.2498        |
| Neutrophils                     | 0.0474 | 0.0550 | 0.0595 | 0.0500 | 0.0674 | 0.0771 | 0.0859 | 0.0592 | 0.7008        | 0.1354        | 0.4005        |
| Eosinophils                     | 0.2235 | 0.1261 | 0.3219 | 0.2026 | 0.3217 | 0.2443 | 0.2524 | 0.1855 | 0.9970        | 0.2645        | 0.3187        |
| Mast cells                      | 0.1025 | 0.0405 | 0.0635 | 0.0379 | 0.0644 | 0.0365 | 0.0717 | 0.0514 | 0.9401        | 0.5730        | 0.6112        |
| Basophils                       | 0.0168 | 0.0335 | 0.1172 | 0.1376 | 0.2509 | 0.2267 | 0.2260 | 0.2212 | 0.0300        | 0.0697        | 0.7267        |
| Mesenchymal stem cells          | 0.4052 | 0.3514 | 0.3699 | 0.3273 | 0.2997 | 0.2396 | 0.3793 | 0.2889 | 0.4435        | 0.9237        | 0.3487        |
| Adipocytes                      | 0.3322 | 0.1387 | 0.2149 | 0.1454 | 0.2537 | 0.1210 | 0.2443 | 0.1571 | 0.3652        | 0.5425        | 0.8341        |
| Preadipocytes                   | 0.2823 | 0.1212 | 0.2242 | 0.1108 | 0.2814 | 0.1283 | 0.2157 | 0.1276 | 0.1398        | 0.8226        | 0.1128        |
| Fibroblasts                     | 0.4991 | 0.1417 | 0.1996 | 0.1895 | 0.4253 | 0.2459 | 0.3942 | 0.3277 | 0.0024        | 0.0271        | 0.7361        |
| Endothelial cells               | 0.3063 | 0.0891 | 0.0894 | 0.1054 | 0.1133 | 0.1001 | 0.1213 | 0.1523 | 0.4661        | 0.4463        | 0.8465        |
| Microvascular endothelial cells | 0.3174 | 0.1455 | 0.1708 | 0.1299 | 0.1874 | 0.1112 | 0.1785 | 0.1561 | 0.6679        | 0.8673        | 0.8368        |
| Lymphatic endothelial cells     | 0.2609 | 0.0348 | 0.1347 | 0.1025 | 0.1506 | 0.0921 | 0.1289 | 0.1125 | 0.6107        | 0.8644        | 0.5093        |
| Smooth muscle cells             | 0.2847 | 0.0820 | 0.0115 | 0.0346 | 0.0848 | 0.0690 | 0.0194 | 0.0464 | <b>0.0001</b> | 0.5417        | <b>0.0011</b> |
| Skeletal muscle cells           | 0.1043 | 0.0256 | 0.0431 | 0.0418 | 0.0699 | 0.0422 | 0.0669 | 0.0664 | 0.0509        | 0.1830        | 0.8652        |
| Epithelial cells                | 0.4073 | 0.0715 | 0.3968 | 0.1701 | 0.4005 | 0.1364 | 0.3588 | 0.1986 | 0.9407        | 0.5193        | 0.4439        |
| Sebocytes                       | 0.0284 | 0.0056 | 0.0428 | 0.0182 | 0.0400 | 0.0141 | 0.0388 | 0.0182 | 0.5877        | 0.4862        | 0.8116        |
| Keratinocytes                   | 0.3359 | 0.0484 | 0.3332 | 0.1480 | 0.3059 | 0.1158 | 0.2887 | 0.1593 | 0.5186        | 0.3654        | 0.6990        |
| Mesangial cells                 | 0.0764 | 0.0673 | 0.0264 | 0.0369 | 0.0522 | 0.0579 | 0.0590 | 0.0629 | 0.1012        | 0.0525        | 0.7230        |
| Melanocytes                     | 0.0797 | 0.0514 | 0.0755 | 0.0679 | 0.1227 | 0.0833 | 0.1031 | 0.0760 | 0.0565        | 0.2329        | 0.4407        |
| Immune Score                    | 0.6106 | 0.3305 | 1.4919 | 0.4219 | 1.2211 | 0.2812 | 1.2924 | 0.5580 | <b>0.0220</b> | 0.2100        | 0.6130        |
| Stroma Score                    | 0.5688 | 0.1091 | 0.2519 | 0.1736 | 0.3961 | 0.1750 | 0.3799 | 0.2813 | <b>0.0127</b> | 0.0916        | 0.8276        |
| Microenvironm ent Score         | 1.1794 | 0.2760 | 1.7438 | 0.3997 | 1.6173 | 0.3135 | 1.6723 | 0.4563 | 0.2724        | 0.6011        | 0.6595        |
